# Supplementary material for: Polymer patchy colloids with sticky patches
Source: Royal Society of Chemistry journal article supplement (doi:10.1039/c3py01096a), 2013-09-12
Supplement: c3py01096a.pdf [file c3py01096a.pdf]

## Supporting Information for:

### Polymer Patchy Colloids with Sticky Patches

Yi Zhao, Rüdiger Berger, Katharina Landfester, Daniel Crespy\*

Max Planck Institute for Polymer Research, Ackermannweg 10, 55128 Mainz, Germany

E-mail: crespy@mpip-mainz.mpg.de

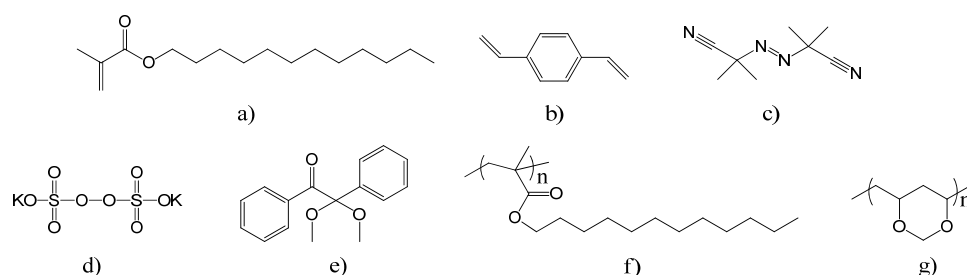

**Fig. S1** Chemical structures of the monomers, initiators, and polymers mentioned in this study: **a)** dodecyl methacrylate (DMA); **b)** 1,4-divinylbenzene (DVB); **c)** azobisisobutyronitrile (AIBN); **d)** potassium persulfate (KPS); **e)** 2,2-dimethoxy-2-phenylacetophenone (DMPA); **f)** poly(dodecyl methacrylate) (PDMA); **g)** poly(vinyl formal) (PVF).

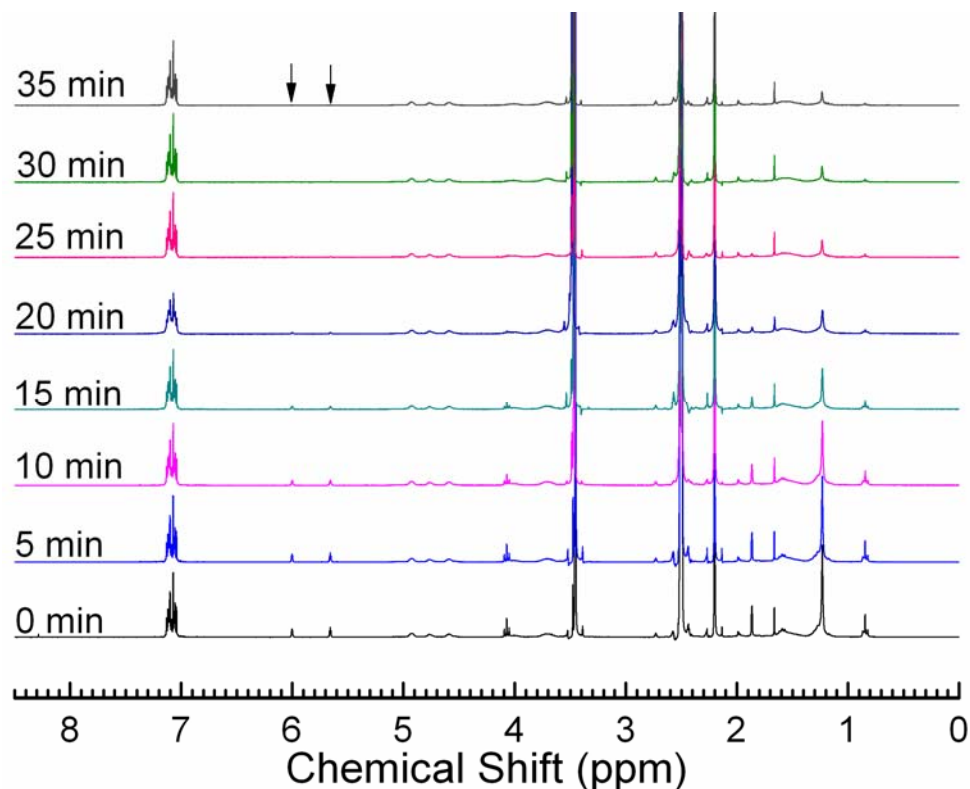

**Fig. S2**  $^1\text{H}$  NMR spectra of the dispersion (Entry 7 in Table 1) diluted in  $\text{DMSO-}d_6$  after polymerizing at different times. Xylene (7.02~7.16 ppm) was used as the external standard while the arrows showing the integral of protons near carbon-carbon double bond (6.0 ppm and 5.66 ppm) in DMA decreased with reaction time.

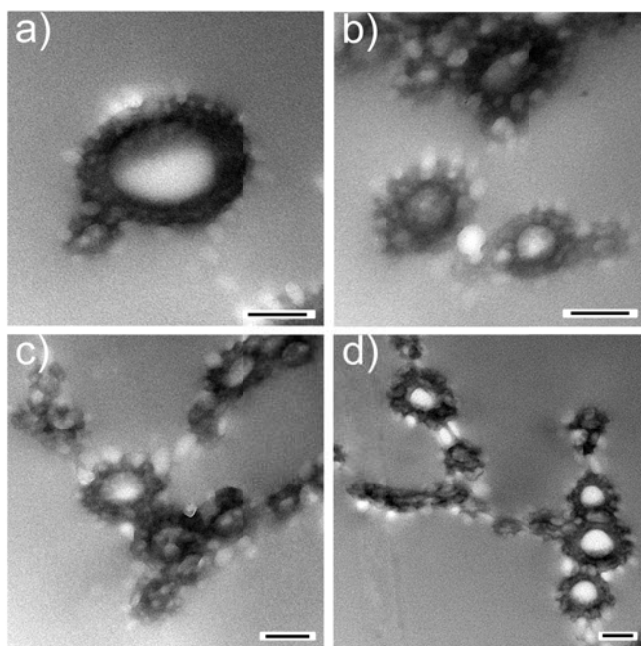

**Fig. S3** Cross-section TEM micrographs for PPs (Entry 1 of Table 1) showing the core-shell structure of PPs and two distinct phases on the particles surface. The scale bars represent 200 nm.

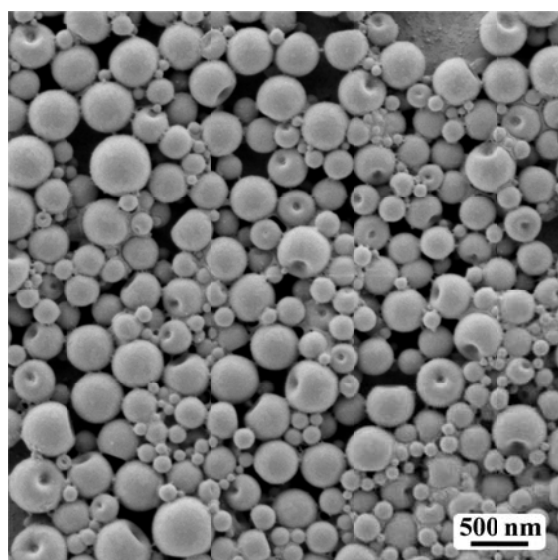

**Fig. S4** SEM micrograph of the obtained PVF/PDMA nanoparticles showed that there was no multiple patches on particle surface when the photo-induced polymerization was carried out at room temperature.

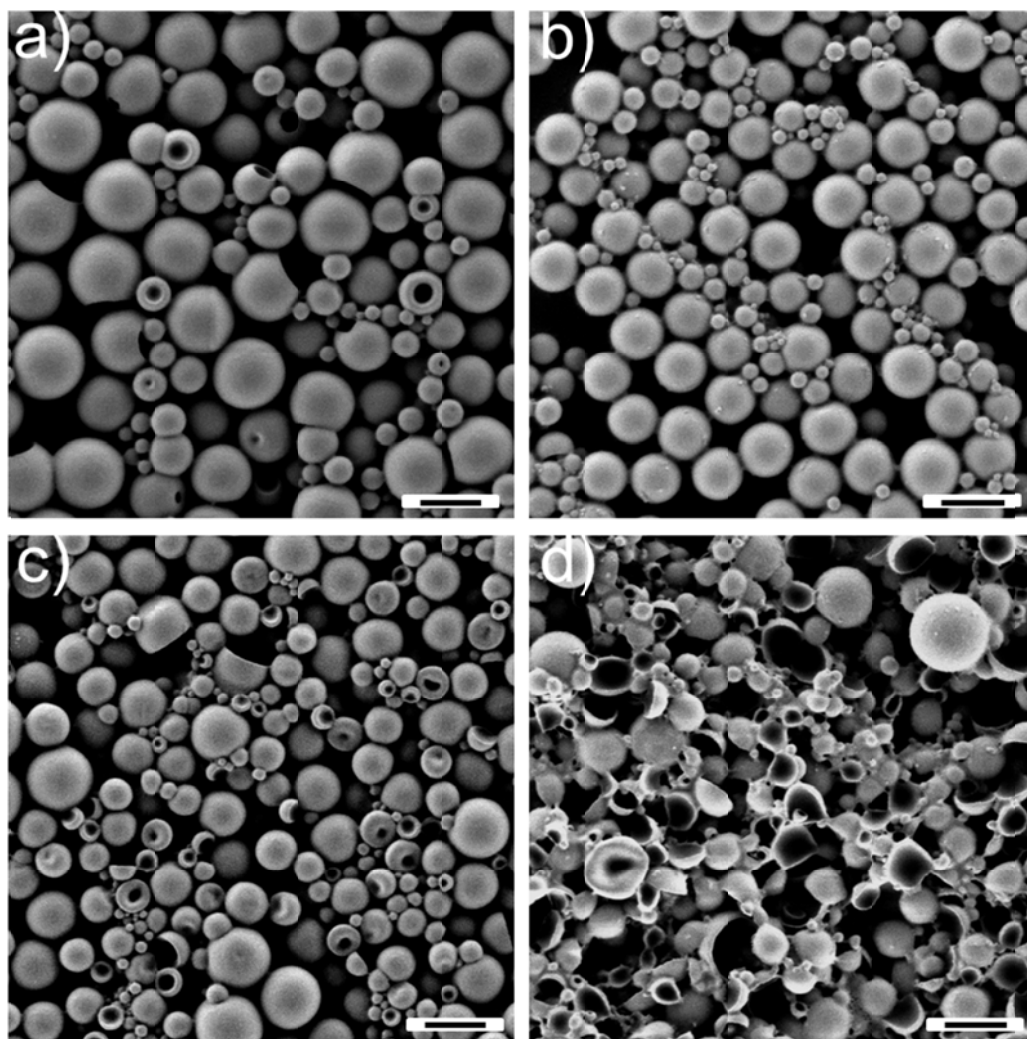

**Fig. S5** SEM micrographs of PVF nanoparticles with different DMA contents (wt.% compared to the total amount of monomers) before polymerization: **a)** 10% (Entry 5 in Table 1); **b)** 20% (Entry 6 in Table 1); **c)** 40% (Entry 7 in Table 1); **d)** 60% (Entry 8 in Table 1). The scale bars represent 500 nm.

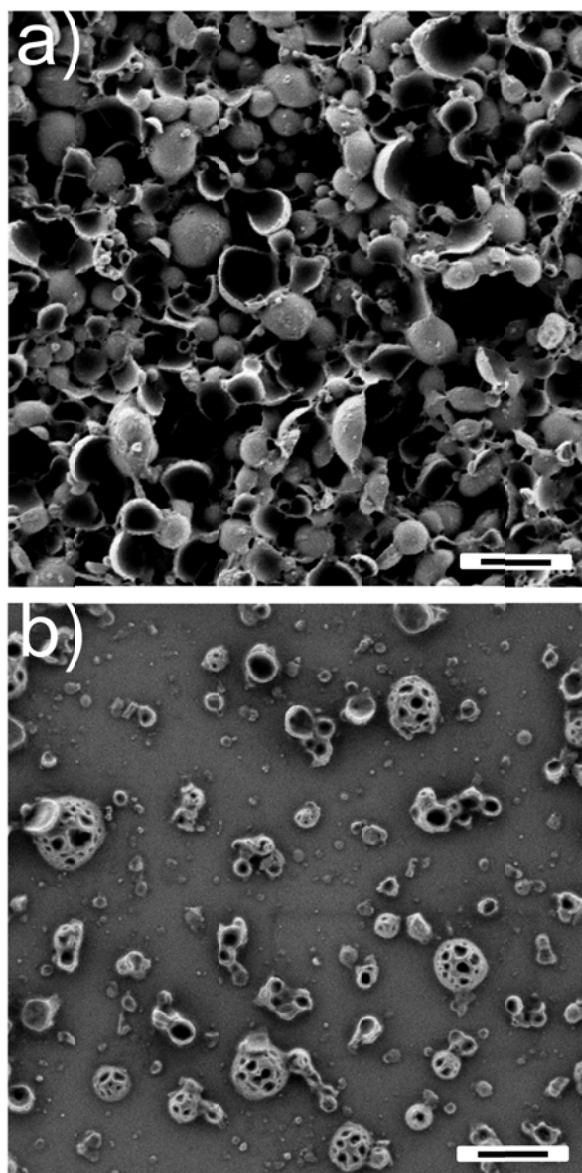

**Fig. S6** SEM micrographs of PVF nanoparticles (Entry 9 in Table 1) prepared with a DMA content (wt.% compared to the total amount of monomers) of 80% **a)** before, and **b)** after polymerization. The scale bars represent 500 nm.



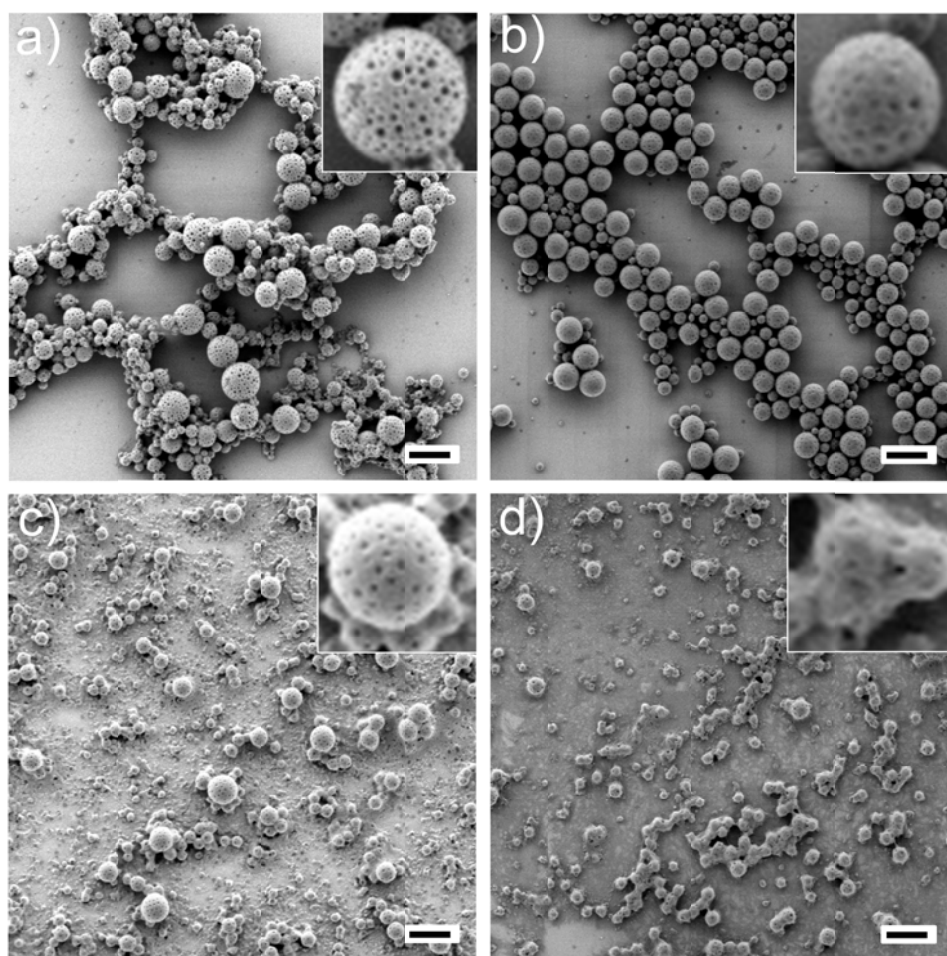

**Fig. S7** SEM micrographs of PPs (Entry 6 of Table 1) annealed at 90 °C in water for different times: **a)** 0 h; **b)** 1 h; **c)** 2 h; **d)** 3h. The scale bars represent 500 nm.

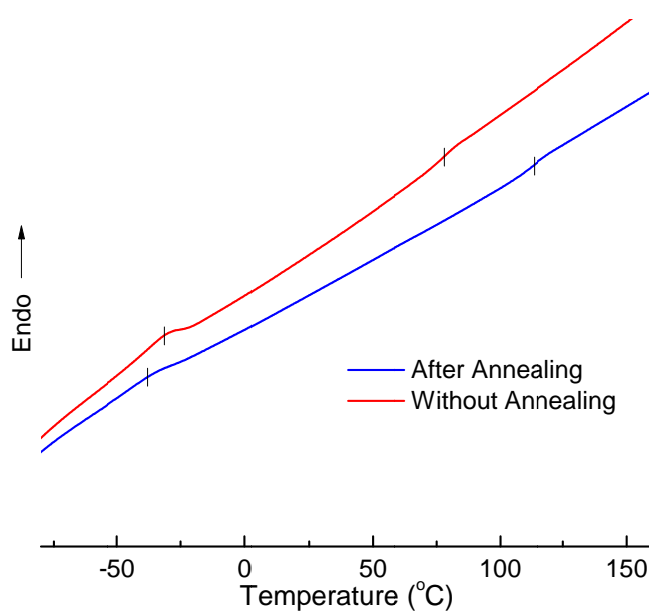

**Fig. S8** DSC curves of PPs powder (Entry 1 in Table 1) before annealing and after annealing at 120 °C for 24 h.

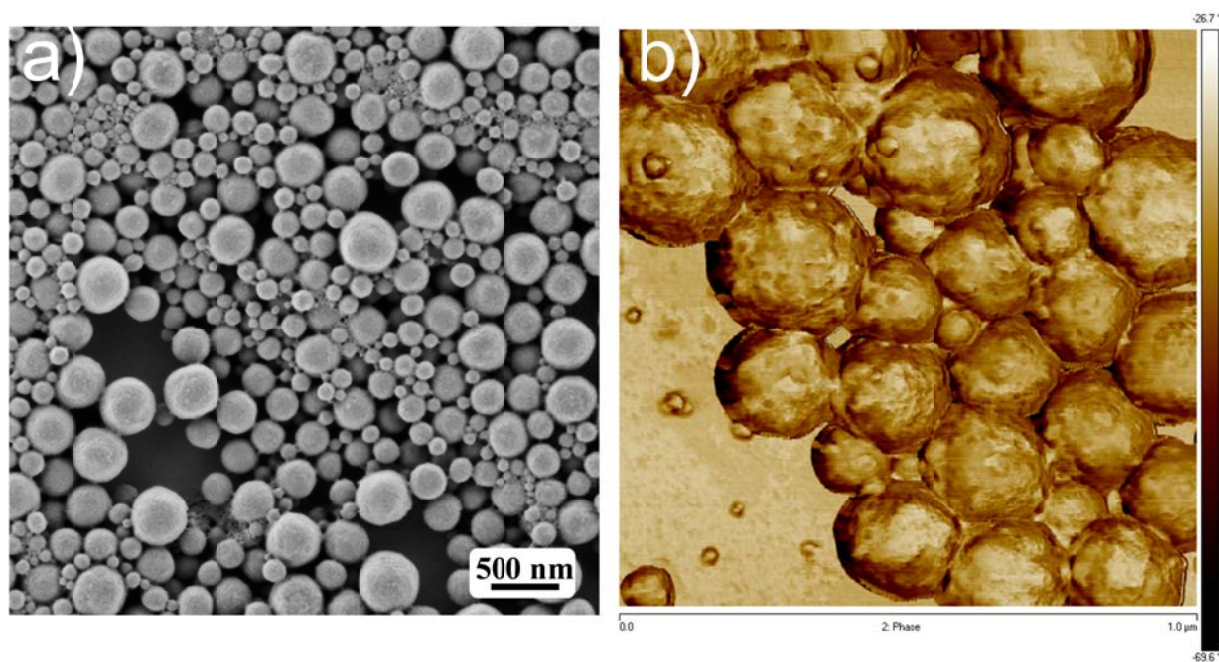

**Fig. S9** **a)** SEM micrographs and **b)** AFM phase image of the crosslinked PPs (Entry 10 of Table 1, 15 wt.% DVB). The patchy domains could not be easily identified from the phase image when the initial amount of DVB was 15 wt.%.
